## **Correction: Evolution of Melanopsin Photoreceptors: Discovery and Characterization of a New Melanopsin in Nonmammalian Vertebrates**

James Bellingham, Shyam S. Chaurasia, Zara Melyan, Cuimei Liu, Morven A. Cameron, Emma E. Tarttelin, P. Michael Iuvone, Mark W. Hankins, Gianluca Tosini, Robert J. Lucas

DOI: 10.1371/journal.pbio.0040254

In *PLoS Biology*, volume 4, issue 8:

There was an error in the legend for Figure 4. The text describing part A should read “chicken chromosome 6” rather than “chicken chromosome 4.”

This correction note may be found online at DOI: 10.1371/journal.pbio.0040320.

Published October 17, 2006.

Citation: (2006) Correction: Evolution of melanopsin photoreceptors: Discovery and characterization of a new melanopsin in nonmammalian vertebrates. *PLoS Biol* 4(10): e320. DOI: 10.1371/journal.pbio.0040320

## **Correction: Math and Fossils Resolve a Debate on Dinosaur Metabolism**

Liza Gross

DOI: 10.1371/journal.pbio.0040255

In *PLoS Biology*, volume 4, issue 8:

The figure caption is missing a credit. The caption should read as follows: A model based on growth trajectories estimated from fossils provides evidence that dinosaurs were reptiles whose body temperatures increased with body size. (Painting: Skye White).

This correction note may be found online at DOI: 10.1371/journal.pbio.0040328.

Published October 17, 2006.

Citation: (2006) Correction: Math and fossils resolve a debate on dinosaur metabolism. *PLoS Biol* 4(10): e328. DOI: 10.1371/journal.pbio.0040328
